# Supplementary material for: Influence of wine-processing on the pharmacokinetics of anthraquinone aglycones and glycosides from rhubarb in hyperlipidemic hamsters
Source: Royal Society of Chemistry journal article supplement (doi:10.1039/c5ra27273d), 2016-01-01
Supplement: c5ra27273d1.pdf [file c5ra27273d1.pdf]

**Influence of wine-processing on pharmacokinetics of anthraquinone aglycones and glycosides from rhubarb in hyperlipidemic hamsters**

Min Wang<sup>a</sup>, Guangnan Hu<sup>a</sup>, Yuan Tian<sup>a</sup>, Zunjian Zhang<sup>a,b,c\*</sup>, Rui Song<sup>a,b,c\*\*</sup>

<sup>a</sup> Key Laboratory of Drug Quality Control and Pharmacovigilance (Ministry of Education), China Pharmaceutical University, Nanjing 210009, China

<sup>b</sup> State Key Laboratory of Natural Medicine, China Pharmaceutical University, Nanjing 210009, China

<sup>c</sup> Key laboratory for consistency evaluation of generic drugs, China Pharmaceutical University, Nanjing 210009, China

\* Corresponding author. Tel.: +86 25 83271454; fax: +86 25 8327 1454. E-mail address: zunjianzhangcpu@hotmail.com (Zunjian Zhang)

\*\* Corresponding author. Tel.: +86 25 83271185. E-mail address: songrui@cpu.edu.cn (Rui Song)

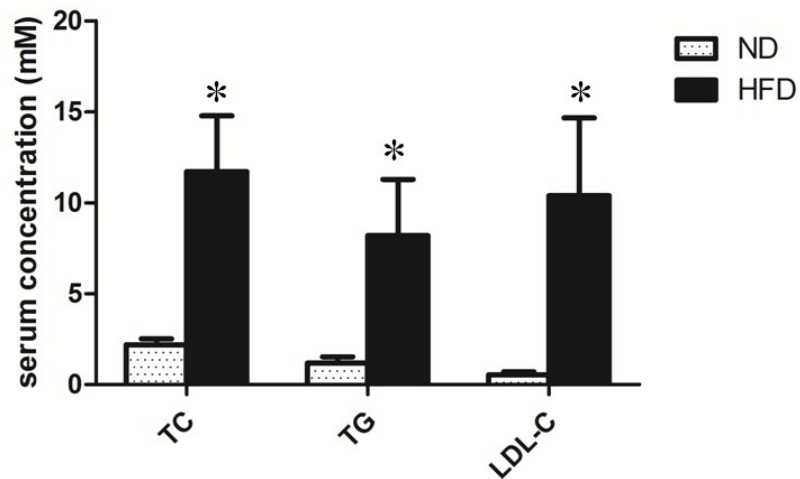

Figure S1 Serum lipid levels of hamsters fed with normal diet or high-fat diet. ND: hamsters fed with normal diet, HFD: hamsters fed with high-fat diet. Data are represented as mean value  $\pm$  SD. \* $p < 0.01$  versus normal hamsters.

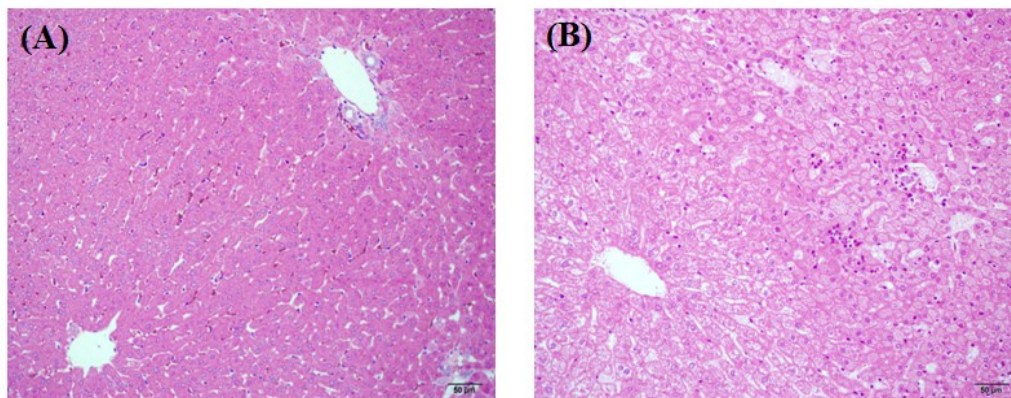

Figure S2 Hepatic histopathological examination with H&E staining. (A): hamsters fed with normal diet, (B): hamsters fed with high-fat diet.

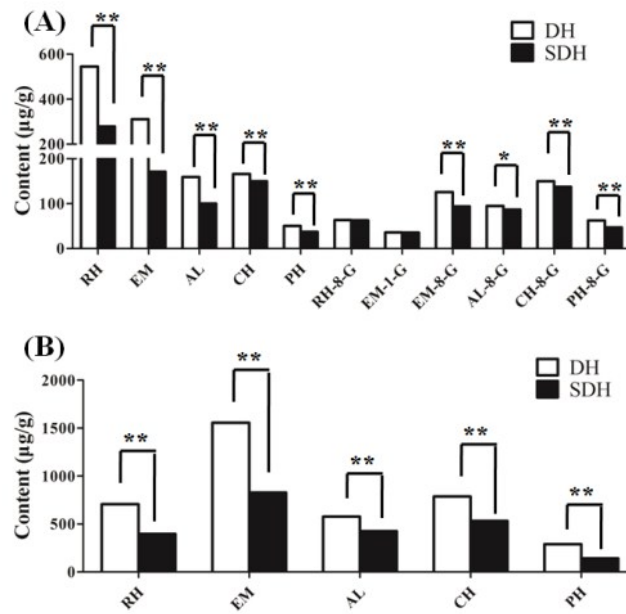

Figure S3 The *in vitro* contents of anthraquinone aglycones and glycosides in DH and SDH before (A) and after (B) acid hydrolysis. \* $p < 0.05$ , \*\* $p < 0.01$  versus DH. RH: rhein, EM: emodin, AL: aloë-emodin, CH: chrysophanol, PH: physcion, RH-8-G: rhein-8-O- $\beta$ -D-glucoside, EM-1-G: emodin-1-O- $\beta$ -D-glucoside, EM-8-G: emodin-8-O- $\beta$ -D-glucoside, AL-8-G: aloë-emodin-8-O- $\beta$ -D-glucoside, CH-8-G: chrysophanol-8-O- $\beta$ -D-glucoside, PH-8-G: physcion-8-O- $\beta$ -D-glucoside.
